# Supplementary material
Source: publisher figshare collection journal article supplement (https://tandf.figshare.com/ndownloader/files/16840337)
Supplement: Supplementary file 1 [file 16840337]

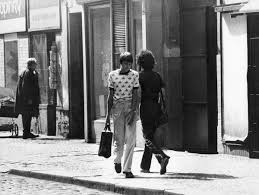


JiříKovanda, *Contact,* action in Prague, September 3, 1979


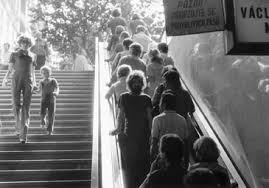


JiříKovanda, *Untitled,* action in Prague, 1977


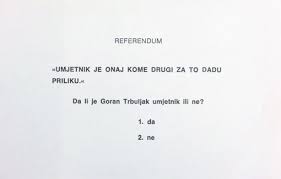


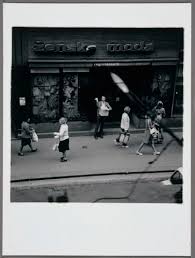


Goran Trbuljak, *Referendum*, action on Ilica Street, Zagreb, Yugoslavia, 1972


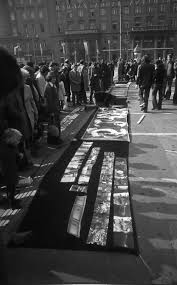


Group of Six Artists, *Exhibition-Action*, action on Republic Square, Zagreb, Yugoslavia, September 25, 1975.
